# Supplementary material for: Differential effects of right and left heart failure on skeletal muscle in rats
Source: PubMed Central journal article supplement — J Cachexia Sarcopenia Muscle. 2020 Sep 28;11(6):1830–49. doi: 10.1002/jcsm.12612 (PMC7749622; doi:10.1002/jcsm.12612), 2020-09-28
Supplement: JCSM-11-1830-s001.pdf [file JCSM-11-1830-s001.pdf]

**Supplement to:**

Knapp et al.: Differential effects of right and left heart failure on skeletal muscle in rats

## Supplementary Figures

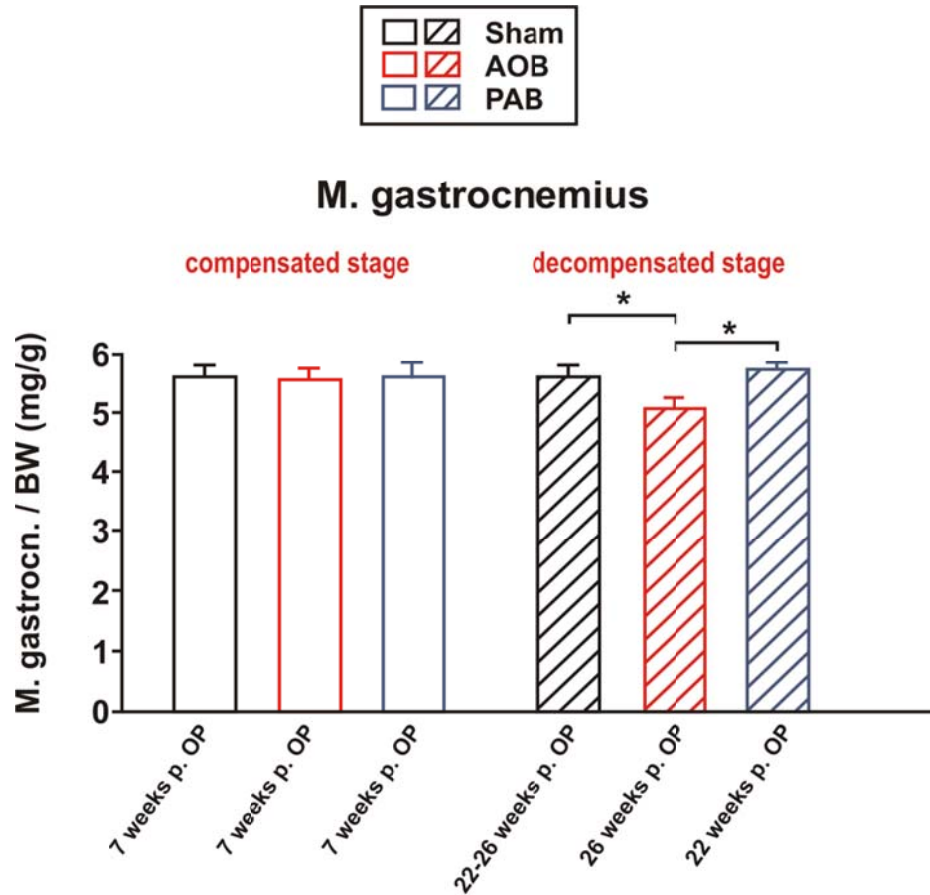

**Suppl. Figure 1:** Differences in the weight of gastrocnemius muscle normalized per body weight in sham animals, AOB animals and PAB animals 7 weeks after surgery (compensated stage) or 22/26 weeks after surgery (decompensated stage). n=10-14 animals per group, \*: p<0.05.

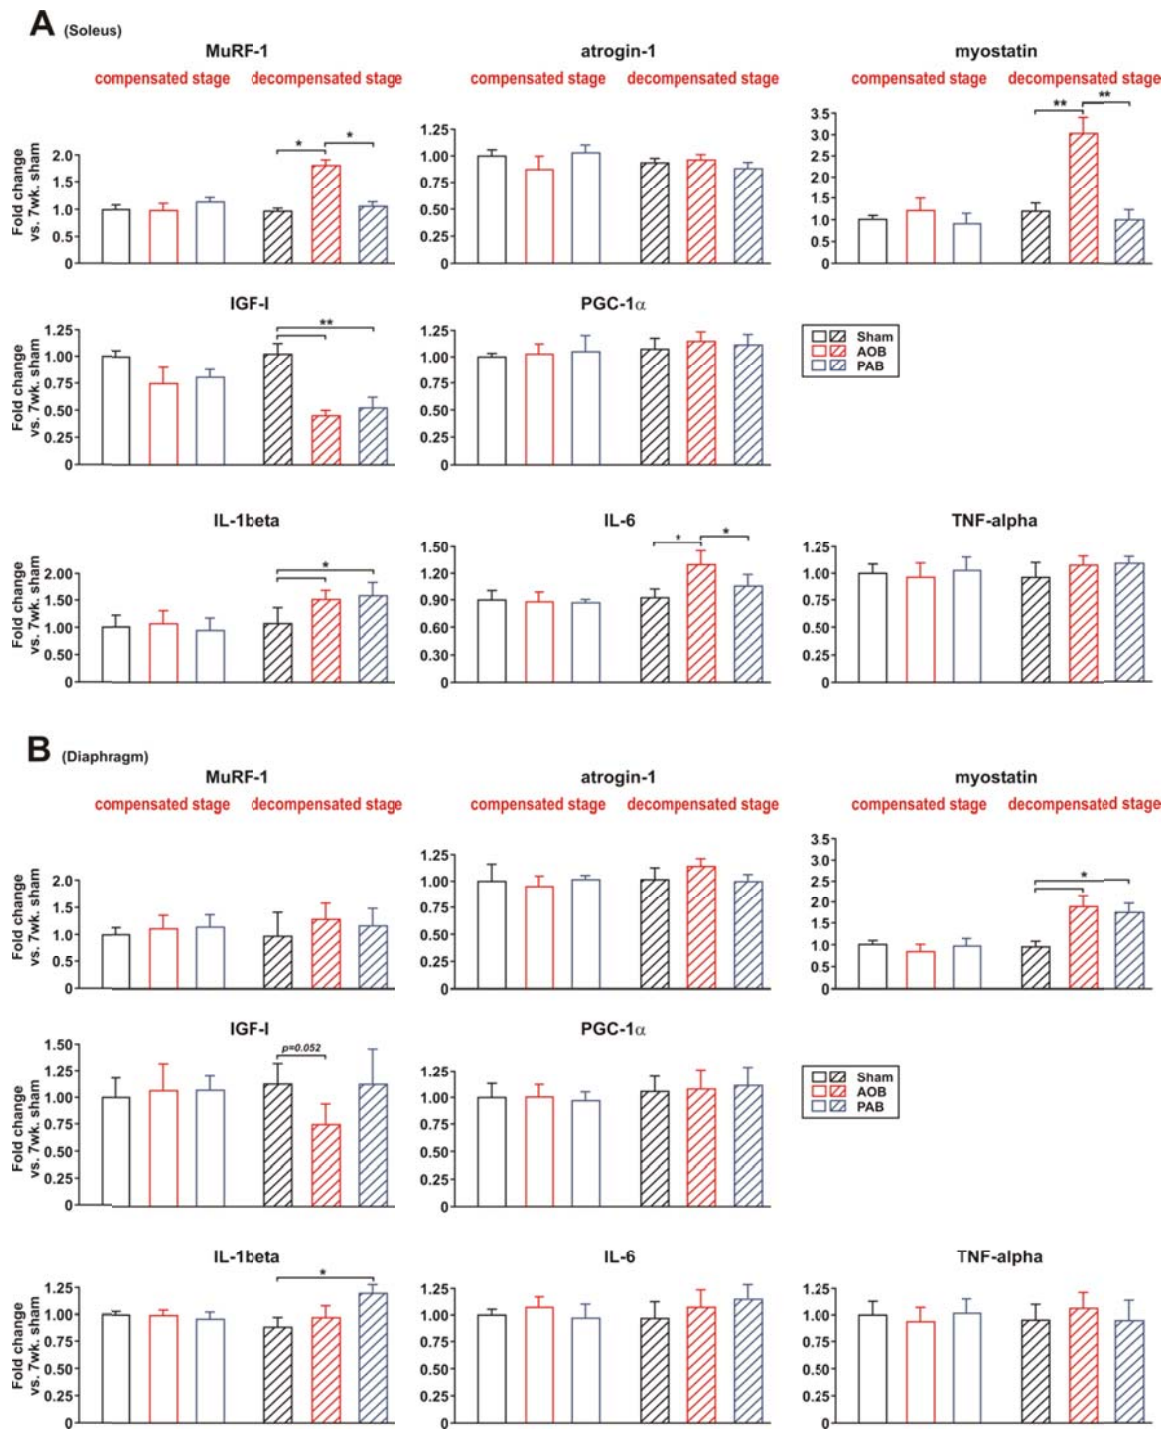

**Suppl. Figure 2:** mRNA expression of MuRF-1, atrogen-1, myostatin, IGF-I, PGC-1a, IL-1beta, IL-6 and TNF-alpha in soleus muscle (**A**) and diaphragm (**B**) of sham animals, AOB animals and PAB animals 7 weeks after surgery (compensated stage) or 22/26 weeks after surgery (decompensated stage), as determined by quantitative real-time PCR. All data are mean±SEM. n =10-14 animals per group, \*: p<0.05, \*\*: p<0.01.

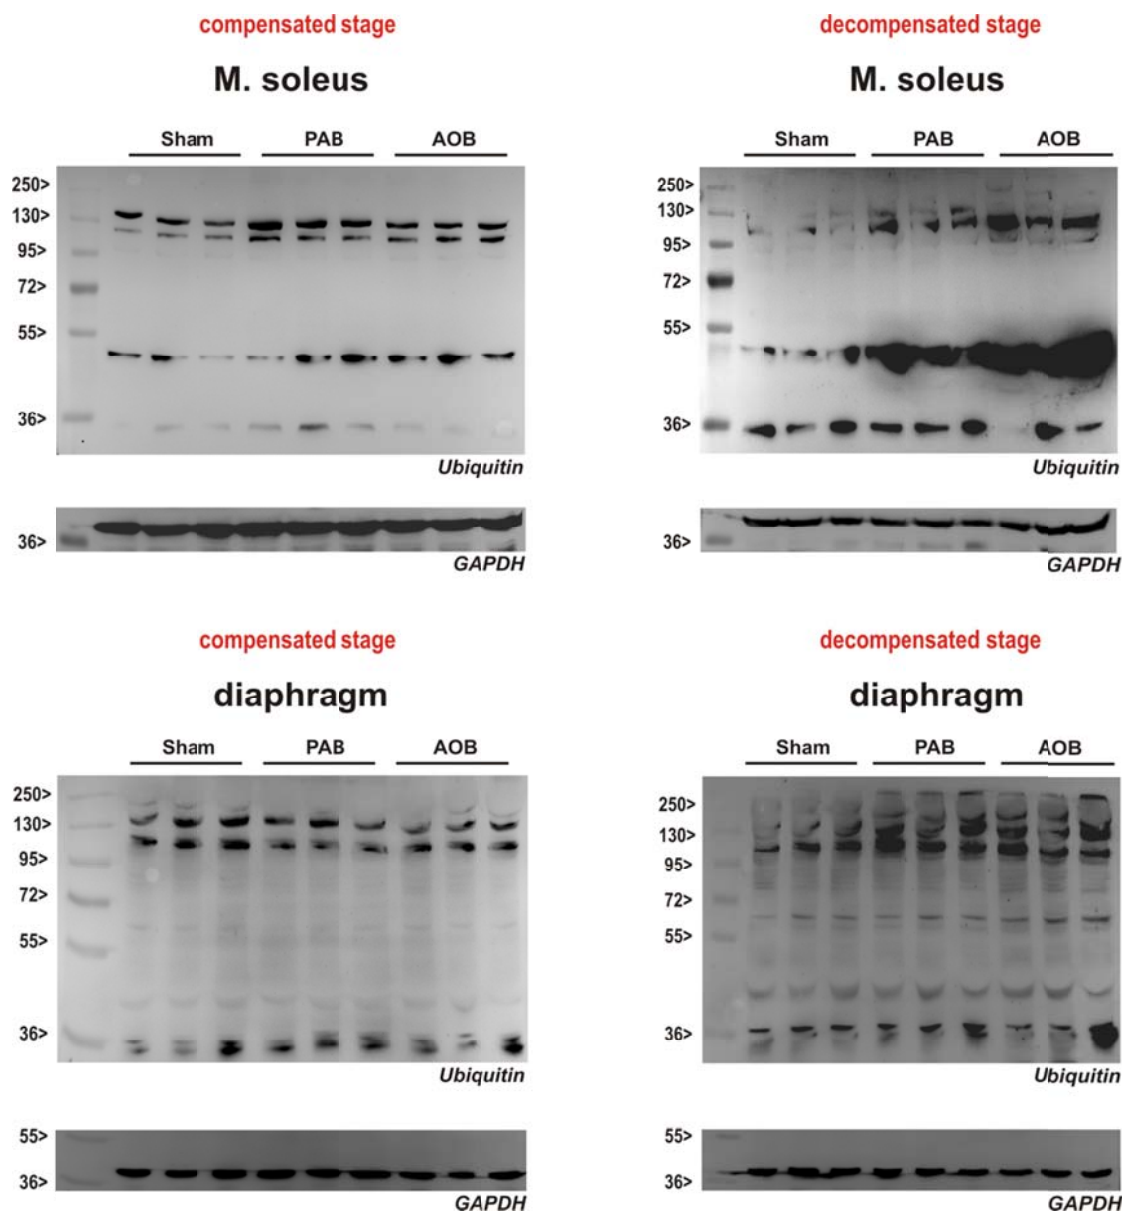

**Suppl. Figure 3:** Representative blots of protein ubiquitination in soleus muscle and diaphragm at both disease stages. Homogenates of skeletal muscle were probed with an antibody detecting ubiquitin. A molecular weight marker to estimate the size of ubiquitinated protein is included. GAPDH served as a loading control. n=6 samples per group.

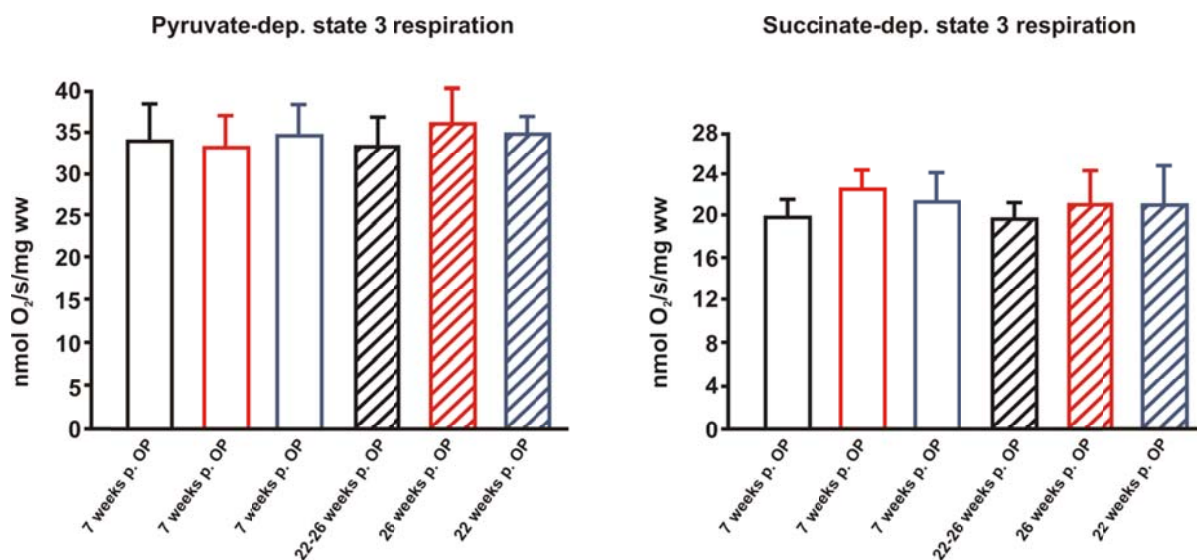

**Suppl. Figure 4:** Active rates of respiration (state 3) were measured in saponin-skinned fibres of the diaphragm in the presence of 5mM ADP and either 10mM pyruvate + 2mM malate or 10mM succinate in the presence of 5 $\mu$ M rotenone. All data are mean $\pm$ SEM. n=6 samples per group. p<0.05.

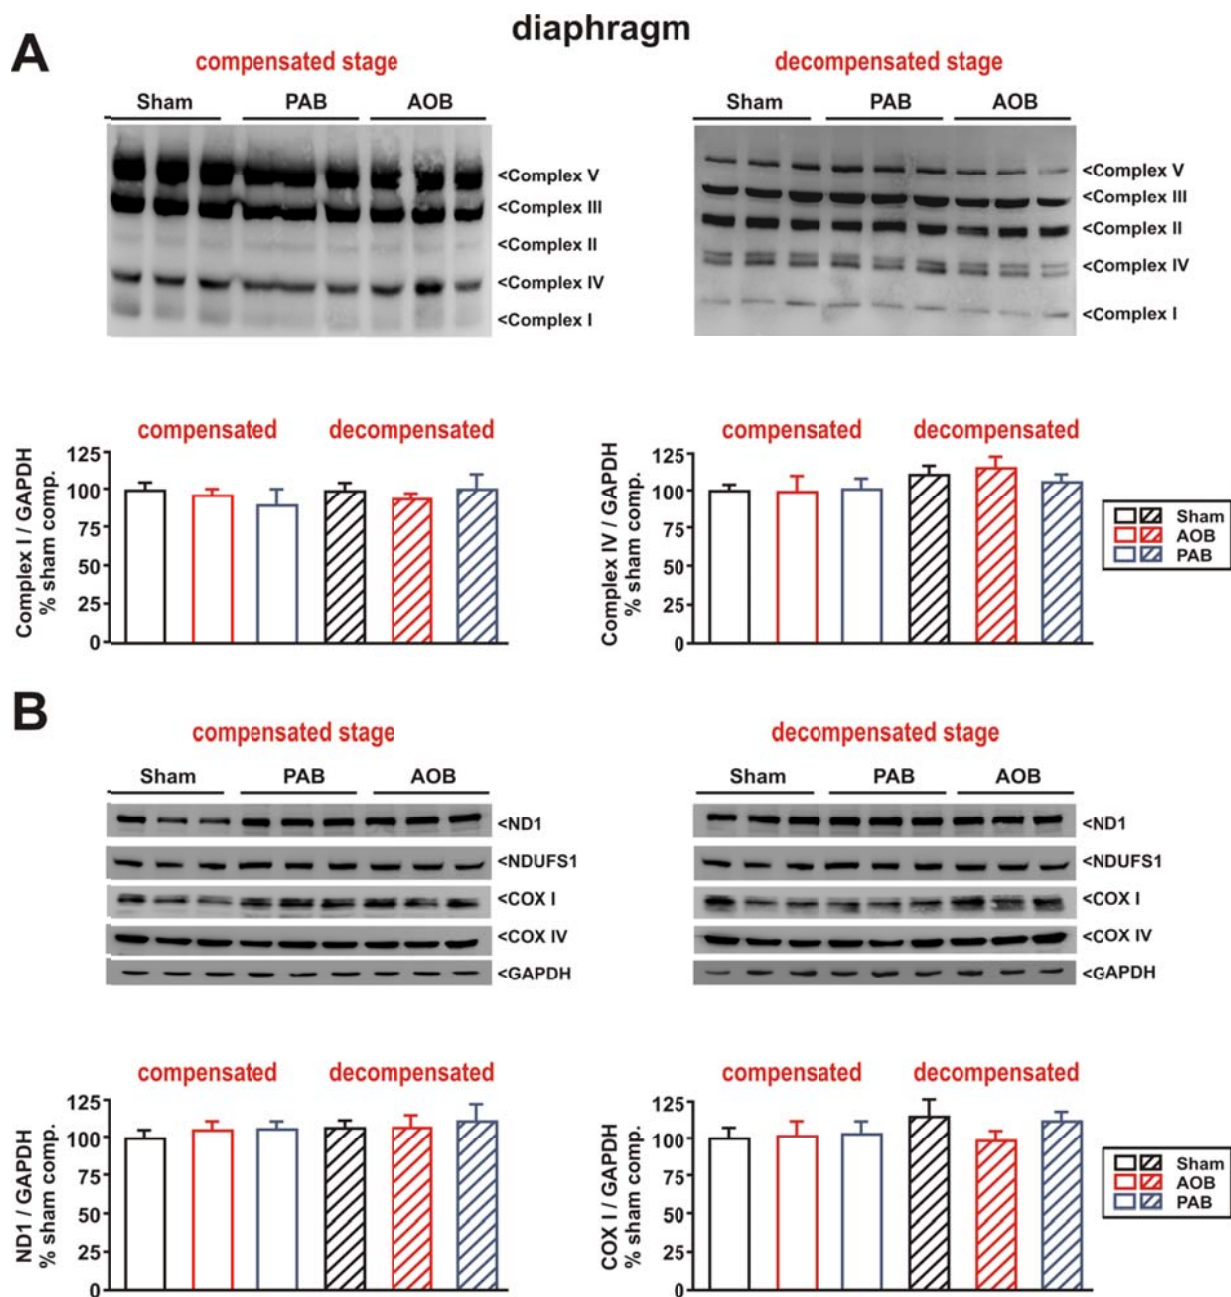

**Suppl. Figure 5: A:** Representative blots and densitometry of selected protein data (complex I, complex IV) from diaphragm at both disease stages. **B:** Representative blots and densitometry of selected protein data (ND1 and COXI) from diaphragm at both disease stages. Homogenates of skeletal muscle were probed with antibodies detecting mitochondrial respiratory chain complex I-V (total oxphos), the complex I proteins ND1 and NDUFS1 as well as the complex IV proteins COXI and COX IV. GAPDH served as a loading control. n=6 samples per group.
